# Supplementary material for: Re-expression of SynGAP protein in adulthood improves translatable measures of brain function and behavior
Source: eLife journal article supplement (doi:10.7554/elife.46752), 2019-04-26
Supplement: figures [file elife-46752-figures-v2.pdf]

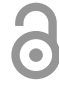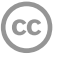

---

## Figures and figure supplements

Re-expression of SynGAP protein in adulthood improves translatable measures of brain function and behavior

**Thomas K Creson *et al***

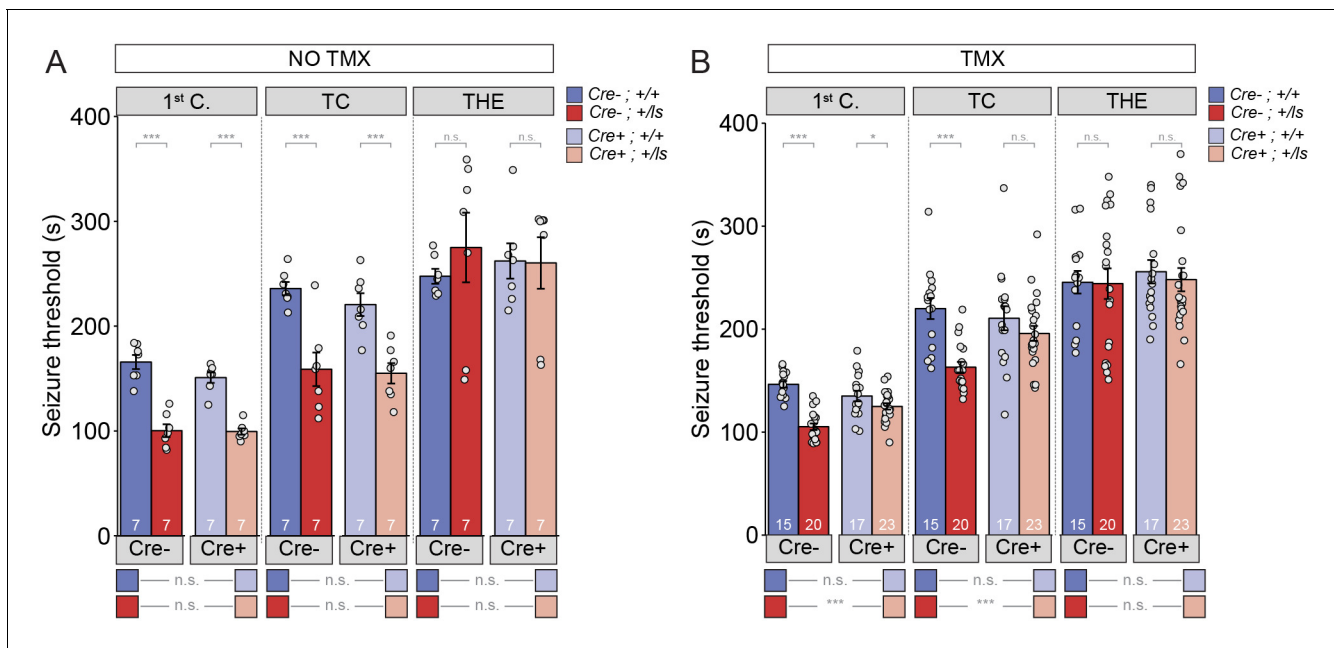

**Figure 1.** Seizure threshold is improved after adult restoration of SynGAP expression. (A) *Syngap*<sup>Cre-;+/ls</sup> and *Syngap*<sup>Cre+;+/ls</sup> mice exhibit hyperexcitability in two of the three events without Cre activation (No TMX) Main effects-1<sup>st</sup> clonus: Cre  $F(1,24)=2.13$ ,  $p=0.157$ , Genotype  $F=117.73$ ,  $p=9.75E-11$ , Interaction  $F(1,24)=1.69$ ,  $p=0.206$ ; Cre- Cohen's  $d=3.855$ , Cre+ Cohen's  $d=4.737$ . TC: Cre  $F(1,24)=7.22$ ,  $p=0.404$ , Genotype  $F(1,24)=40.05$ ,  $p=1.53E-6$ , Interaction  $F(1,24)=.257$ ,  $p=0.617$ ; Cre- Cohen's  $d=2.396$ , Cre+ Cohen's  $d=2.405$ . THE: Cre  $F(1,24)=9.99E-6$ ,  $p=0.998$ , Genotype  $F(1,24)=.320$ ,  $p=0.577$ , Interaction  $F(1,24)=.420$ ,  $p=0.523$ . (B) *Syngap*<sup>Cre+;+/ls</sup> mice exhibit thresholds comparable to those of *Syngap*<sup>Cre-;+/ls</sup> mice after Cre activation (TMX-treated) in two of the three events Main effects-1<sup>st</sup> clonus: Cre  $F(1,71)=2.59$ ,  $p=0.112$ ; Genotype  $F(1,71)=58.328$ ,  $p=7.86E-11$ , Interaction  $F=1(1,71)=18.84$ ,  $p=4.62E-5$ ; Cre- Cohen's  $d=3.329$ , Cre+ Cohen's  $d=0.674$ ; TC: Cre  $F(1,71)=4.53$ ,  $p=0.037$ , Genotype  $F(1,71)=26.15$ ,  $p=2.57E-6$ , Interaction  $F(1,71)=6.50$ ,  $p=0.013$ ; Cre- Cohen's  $d=2.040$ ; Cre+ Cohen's  $d=0.540$ ; THE: Cre  $F(1,71)=.037$ ,  $p=0.847$ , Genotype  $F(1,71)=1.15E-5$ ,  $p=0.997$ , Interaction  $F(1,71)=.049$ ,  $p=0.826$ . Data points (and numbers) in bars represent biological replicates (animals). Data from panel B are pooled from two separate experiments.

DOI: <https://doi.org/10.7554/eLife.46752.002>

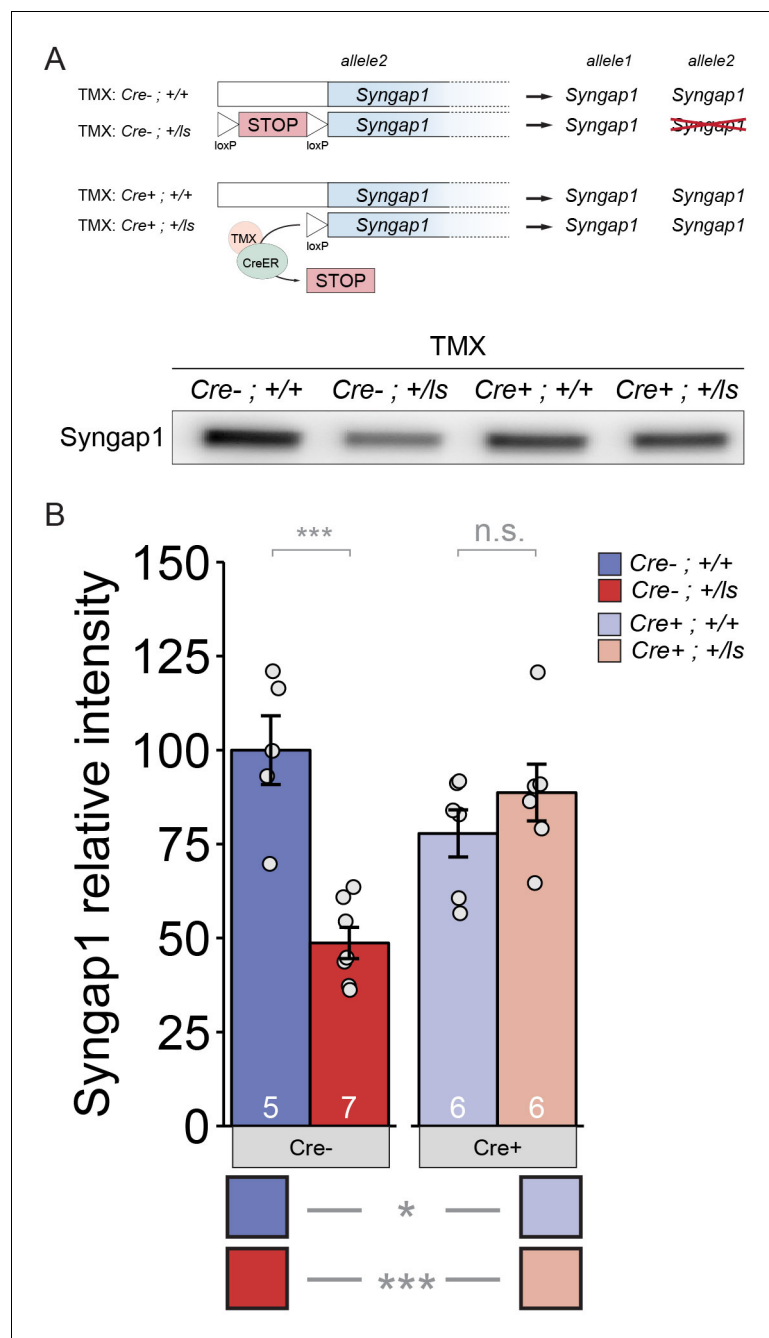

**Figure 1—figure supplement 1.** TMX-induced restoration of SynGAP protein levels in adult *Syngap1<sup>Cre+; +/-</sup>* mice. (A) Western blot demonstrating expression levels of total SynGAP in Cre(-) or Cre(+) heterozygous Lox-Stop mice and WT littermates. (B) Densitometric analysis of SynGAP. Band intensities were normalized to total protein levels and transformed to % of the *Syngap1<sup>Cre-; +/+</sup>* group mean. Two-factor ANOVA. Main effects: Cre  $p=0.198$ , Genotype  $p=0.007$ , Interaction  $p=1.554E-4$ ,  $\eta^2=0$ . Pairwise comparisons from posthoc tests can be found in **Supplementary file 1**. Data points (and numbers) in bars represent biological replicates (animals).

DOI: <https://doi.org/10.7554/eLife.46752.003>

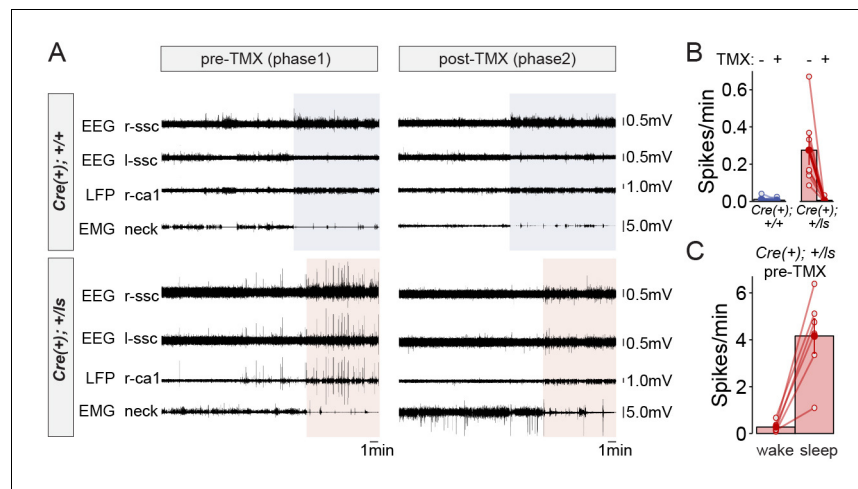

**Figure 2.** Rectification of state-dependent paroxysmal spiking events in *Syngap1* mutants after adult-initiated gene therapy. (A) Representative EEG/LFP traces from a WT [*Cre(+); +/+*] and *Syngap1* heterozygous mutant mouse [*Cre(+); +/-*]. After initial recordings (pre-TMX), all animals were injected with TMX. Post-TMX recordings were acquired 30 days after the last TMX injection. TMX rescued low levels of SynGAP protein in *+/-* animals (see **Figure 1—figure supplement 1**). Highlighted areas correspond to periods of sleep (see Materials and methods). Phase I and Phase II recordings are from the same animals. (B) Frequency of spiking events observed in the hippocampal LFP channel during the wake phase (i.e. non-highlighted areas in panel A) from both pre- and post-TMX recording sessions in each animal. Two-way repeated measures ANOVA: Main genotype effects:  $F(1,11) = 10.1$ ,  $p = 0.00879$ , Main TMX effects:  $F(1,11) = 12.088$ ,  $p = 0.00518$ . Interaction between genotype and TMX:  $F(1,11) = 9.777$ ,  $p = 0.00963$ . *Cre(+); +/+*  $n = 6$ , *Cre(+); +/-*  $n = 7$ . (C) Comparison of the spiking frequency from the hLFP channel in *Cre(+); +/-* mice during wake and sleep before TMX injections, paired-t test  $t(5) = -5.6007$ ,  $p = 0.002507$  ( $n = 5$ ). Data points in plots represent biological replicates (animals).

DOI: <https://doi.org/10.7554/eLife.46752.007>

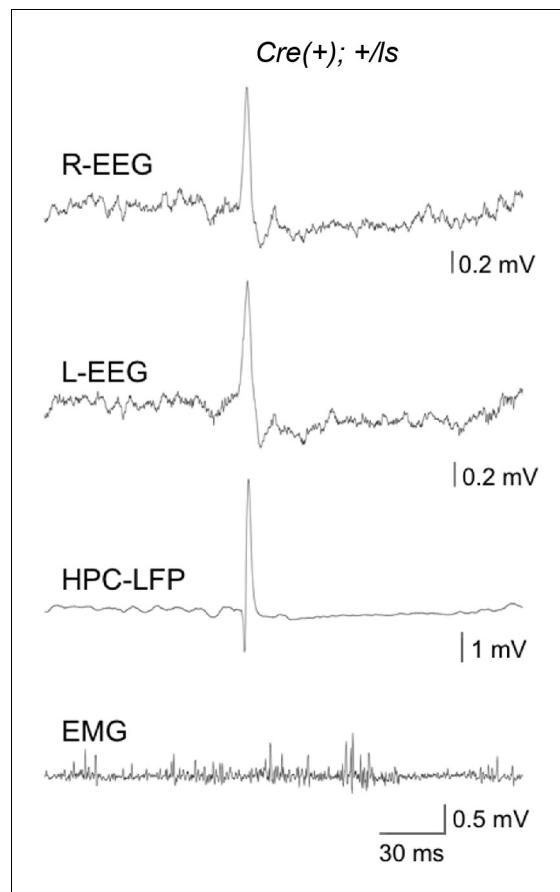

**Figure 2—figure supplement 1.** Generalization of high-amplitude spikes across the forebrain. Representative traces from all channels during a Phase I recording from a Cre(+) Lox-Stop mouse.

DOI: <https://doi.org/10.7554/eLife.46752.008>

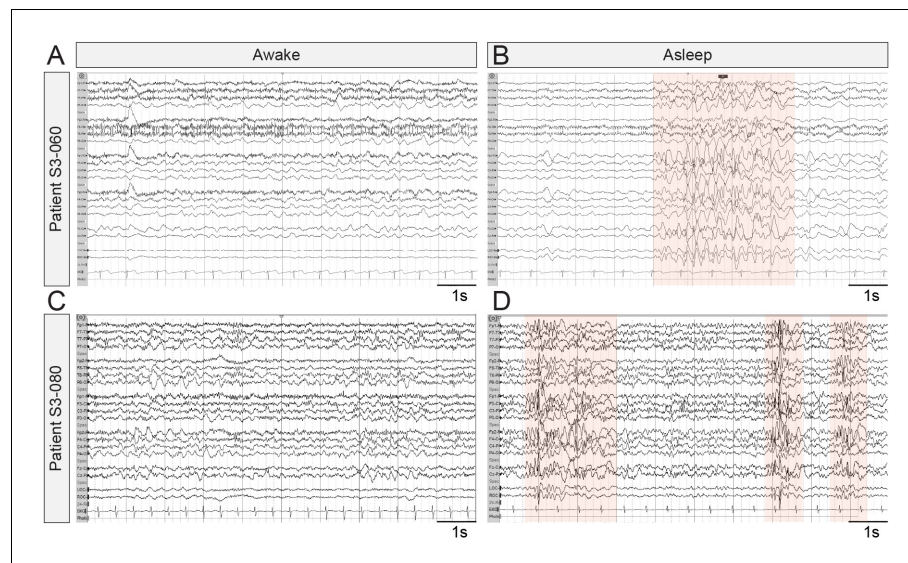

**Figure 3.** Representative EEG recordings taken from *SYNGAP1* patients during wake and sleep. Ten second epochs of electroencephalograms from patients with *SYNGAP1* pathogenic variants. (A) Patient S3-060 while awake (B) Patient S3-060 while asleep (C) Patient S3-080 while awake (D) Patient S3-080 while asleep. Shaded areas indicate bursts of generalized epileptiform activity.  
DOI: <https://doi.org/10.7554/eLife.46752.011>

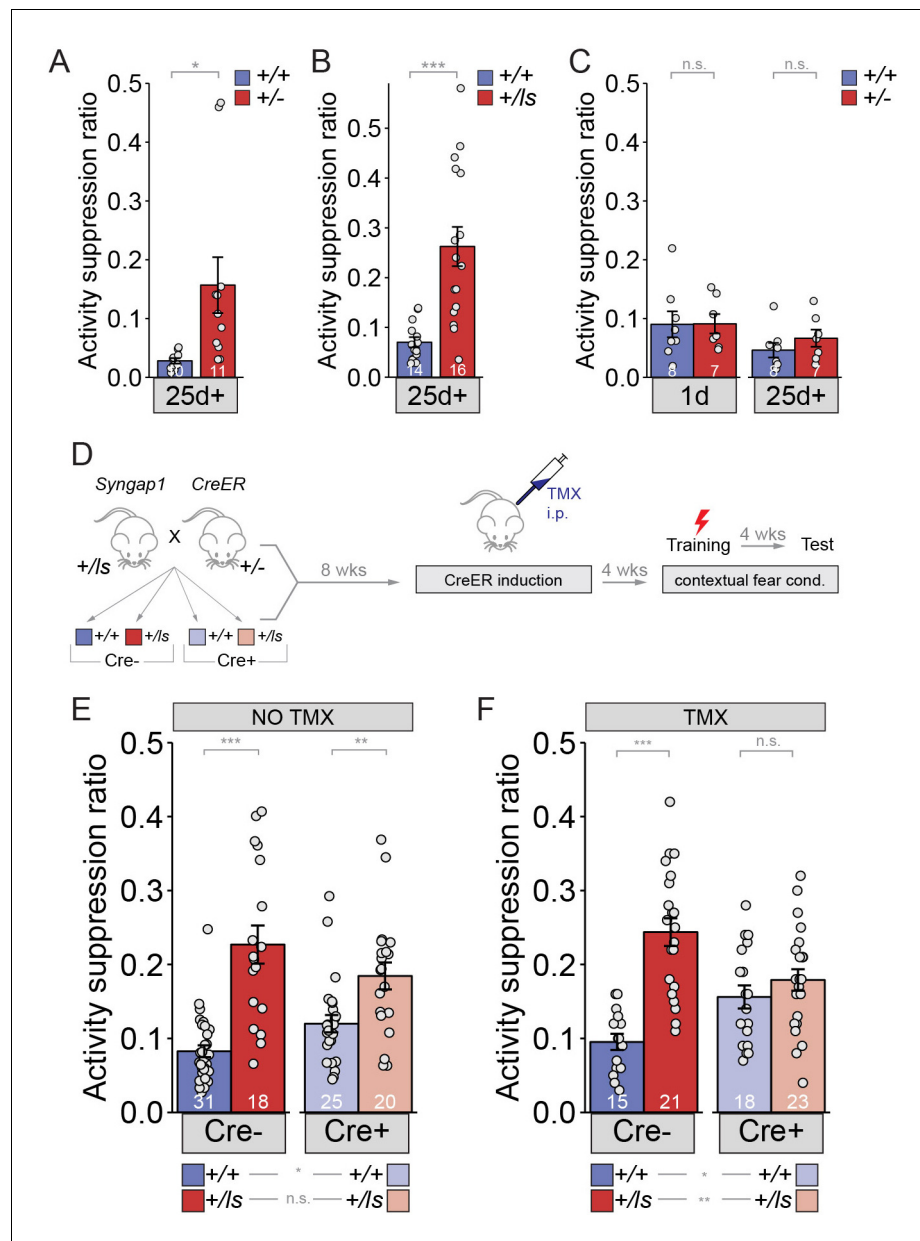

**Figure 4.** Long-term memory can be improved in adult mice with *Syngap1* pathogenicity. (A)  $Syngap1^{+/+}$  and  $Syngap1^{+/-}$  were trained in the remote contextual fear conditioning paradigm and tested one month later for activity suppression levels. Activity of the  $Syngap1^{+/-}$  was suppressed significantly less than that of the  $Syngap1^{+/+}$  group indicating compromised remote memory for the mutant group. Unpaired t test ( $t(19)=-2.567$ ,  $p=0.019$ ). Cohen's  $d = 1.150$ . (B)  $Syngap1^{+/+}$  and  $Syngap1^{+/-}$  mice were trained in the contextual fear conditioning paradigm and tested one month later for activity suppression levels. Activity of the  $Syngap1^{+/-}$  group was suppressed significantly less than that of the  $Syngap1^{+/+}$  group indicating compromised remote memory for the mutant group. Wilcoxon rank sum test  $W = 19$ ,  $p=2.82E-5$ , Cohen's  $d = 1.676$ . (C)  $Syngap1^{+/+}$  and  $Syngap1^{+/-}$  were tested, firstly, 1d after training, followed by another testing one month later. Activity suppression levels were not significantly different between the groups for either testing (unpaired t test, 1-day  $t(13)=-0.033$ ,  $p=0.974$ ; 26 days  $t(13)=-1.068$ ,  $p=0.305$ ). (D) Experimental schematic depicting the breeding strategy for generation of Cre-inducible  $Syngap1^{Cre+;+/-}$  mice and Cre induction with TMX treatment for restoration of *Syngap1* expression and subsequent remote fear conditioning testing. (E–F)  $Syngap1^{Cre+;+/+}$ ,  $Syngap1^{Cre+;+/-}$ ,  $Syngap1^{Cre+;+/+}$ , and  $Syngap1^{Cre+;+/-}$  mice were run in the remote contextual fear conditioning paradigm without (E) and with (F) TMX administration. Activity suppression values from mice without TMX administration (No TMX) were assessed (2-factor ANOVA: Main Effects-Cre  $F(1,90)=0.030$ ,  $p=0.864$ , Genotype  $F(1,91)=46.78$ ,  $p=9.28E-10$ , Interaction  $F(1,91)$  Figure 4 continued on next page

*Figure 4 continued*

=6.81,  $p=0.011$ ; Cre- Cohen's  $d = 1.725$ , Cre+ Cohen's  $d = 0.910$ . **With TMX administration** (2-factor ANOVA: Main Effects- Cre  $F(1,73)=0.019$ ,  $p=0.891$ , Genotype  $F(1,73)=27.49$ ,  $p=1.48E-6$ , Interaction  $F(1,73)=14.75$ ,  $p=2.59E-4$ ; Cre- Cohen's  $d = 2.167$ ). Data points (and numbers) in bars represent biological replicates (animals). Data from panels E-F are pooled from at least two separate experiments.

DOI: <https://doi.org/10.7554/eLife.46752.012>



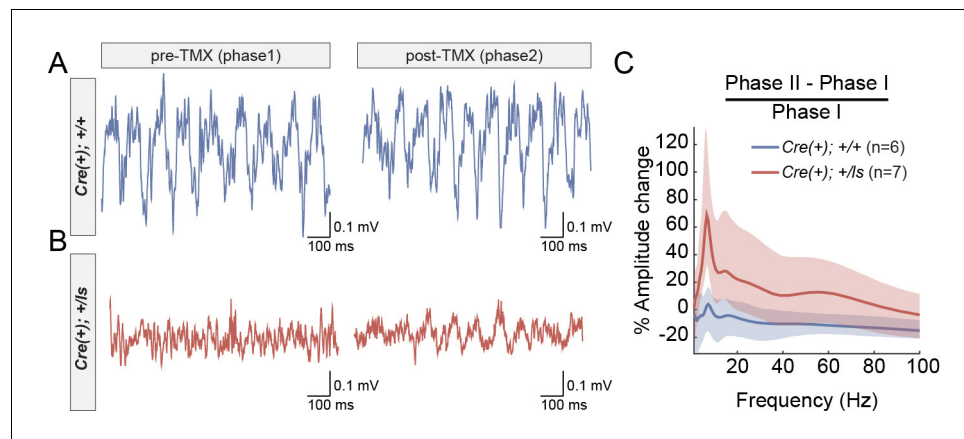

**Figure 5.** Increased amplitude of theta oscillations after SynGAP re-expression in adult *Syngap1* mutant mice. (A–B) CA1 LFP traces from a WT (A) and a *Syngap1* mutant (B) mouse during Phase I and Phase II sessions. (C) Grand average of within-subjects changes in signal amplitude across the full spectrum of hippocampal rhythms. The amplitude change was normalized by the average amplitude during Phase I sessions. The shaded areas represent 95% bootstrapped confidence intervals. Significant increases in amplitude in Phase II were detected in the 6–12 Hz theta range (Permutation test:  $p=0.0128$ , 5000 shuffles). N's are biological replicates (animals). Legends for Figure Supplements.

DOI: <https://doi.org/10.7554/eLife.46752.018>

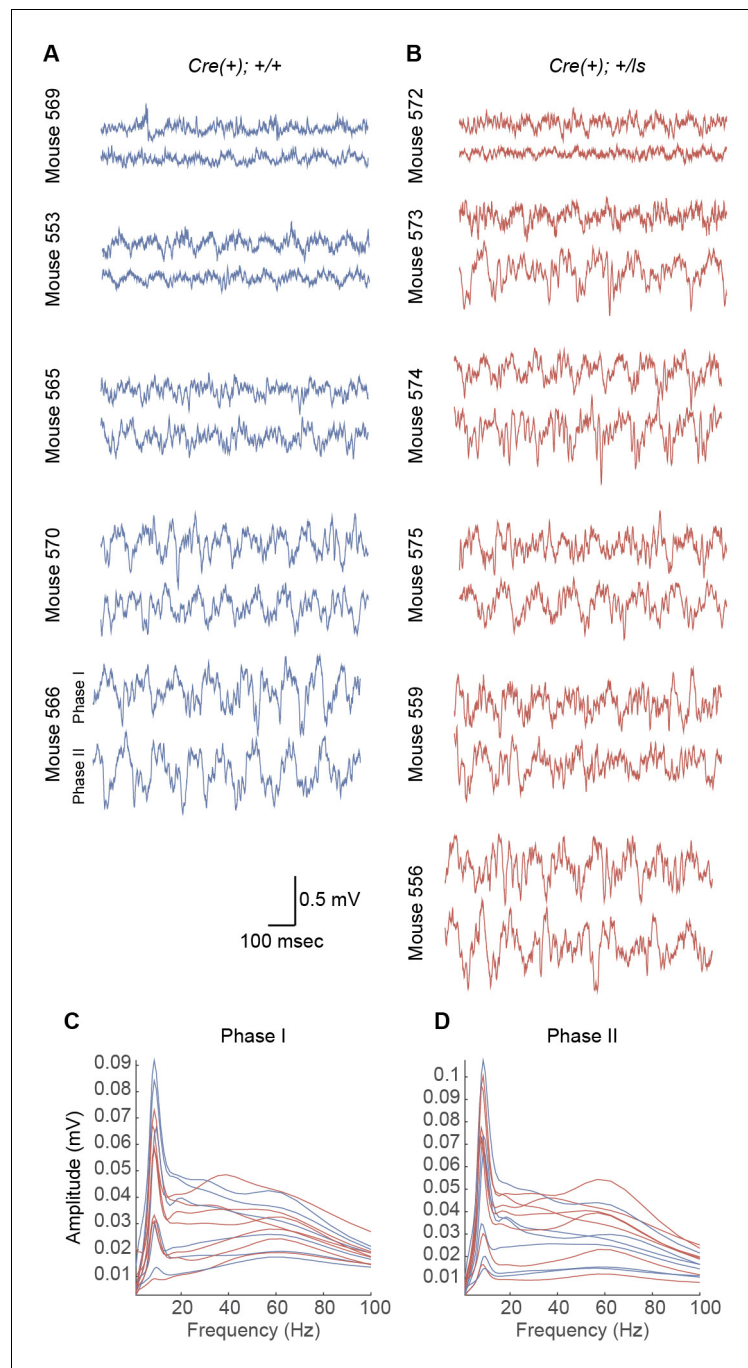

**Figure 5—figure supplement 1.** Amplitude of theta oscillations in each mouse during Phase I and Phase II recording sessions. (A–B) CA1 LFP recordings from WT (A) and *Syngap1* mutant (B) mice during Phase I and Phase II sessions. (C–D) Average amplitude spectra for each mouse during Phase I (C) and Phase II (D) sessions. Individual mice are indicated with individual lines, and WT and *Syngap1* mutant spectra are depicted in blue and red, respectively.

DOI: <https://doi.org/10.7554/eLife.46752.019>

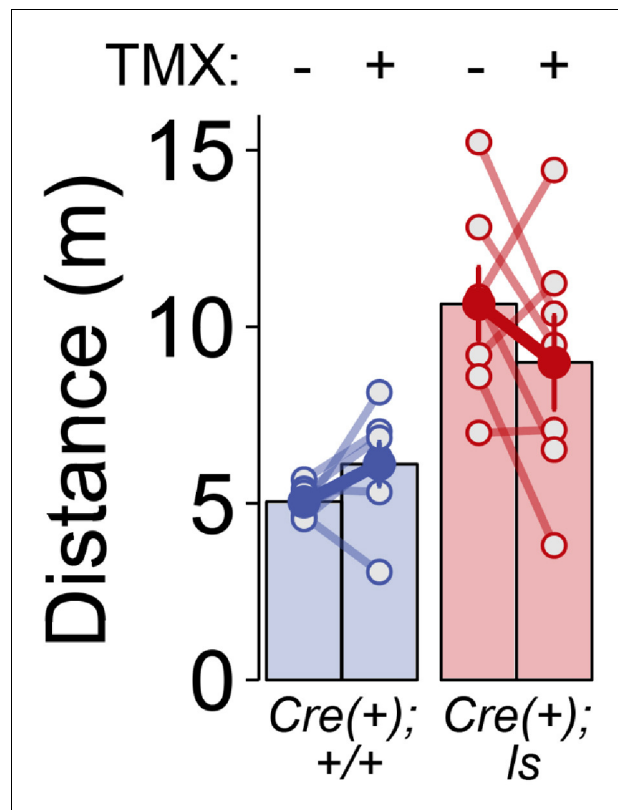

**Figure 5—figure supplement 2.** Effect of genotype, but not phase, on horizontal activity during neurophysiological recordings. Cre(+) WT and Cre(+) Lox-Stop mice were video tracked for distances traveled during the first ten minutes of recording during Phase I (TMX-) and Phase II (TMX+) sessions. RMANOVA- Group:  $F(1,12)=16.527$ ,  $p=0.002$ ; Phase:  $F(1,12)=0.164$ ,  $p=0.692$ ; Group x Phase:  $F(1,12)=3.521$ ,  $p=0.085$ . Data points in bars represent biological replicates (animals). Legends for Supplementary Files.

DOI: <https://doi.org/10.7554/eLife.46752.020>
