# Supplementary material for: Re-expression of SynGAP protein in adulthood improves translatable measures of brain function and behavior
Source: eLife. 2019 Apr 26;8:e46752. doi: 10.7554/eLife.46752 (PMC6504227; doi:10.7554/eLife.46752)
Supplement: Supplementary file 1. — Pairwise comparisons for each of the four groups in data presented in Figure 1A–B. [file elife-46752-supp1.xlsx]

## Sheet: Table S1
Supplemental File 1. Pairwise comparison statistics for Figure 1
No Tamoxifen (Figure 1A)	1st Clonus	Tonic Clonic	Tonic Hindlimb Extension
Syngap1(Cre-);+/+ vs Syngap1(Cre-);+/ls	p=8.72E-9	p=6.34E-5	p=0.399
Syngap1(Cre+);+/+ vs Syngap1(Cre+);+/ls	p=5.51E-7	p=3.93E-4	p=0.954
Syngap1(Cre-);+/+ vs Syngap1(Cre+);+/+	p=0.063	p=0.347	p=0.652
Syngap1(Cre-);+/ls vs Syngap1(Cre+);+/ls	p=0.911	p=0.811	p=0.649
Tamoxifen-treated (Figure 1B)	1st Clonus	Tonic Clonic	Tonic Hindlimb Extension
Syngap1(Cre-);+/+ vs Syngap1(Cre-);+/ls	p=6.96E-12	p=1.52E-6	p=0.878
Syngap1(Cre+);+/+ vs Syngap1(Cre+);+/ls	p=0.018	p=0.065	p=0.874
Syngap1(Cre-);+/+ vs Syngap1(Cre+);+/+	p=.076	p=0.782	p=0.785
Syngap1(Cre-);+/ls vs Syngap1(Cre+);+/ls	p=2.13E-5	p=0.001	p=0.983
