# Supplementary material for: Re-expression of SynGAP protein in adulthood improves translatable measures of brain function and behavior
Source: eLife. 2019 Apr 26;8:e46752. doi: 10.7554/eLife.46752 (PMC6504227; doi:10.7554/eLife.46752)
Supplement: Supplementary file 2. — Pairwise comparisons for each of the four groups in data presented in Figure 1—figure supplement 1B. [file elife-46752-supp2.xlsx]

## Sheet: Table S2
Supplemental File 2. Pairwise comparison statistics for Figure 1-figure supplement 1
Syngap1(Cre-);+/+ vs Syngap1(Cre-);+/ls	p=2.853E-5
Syngap1(Cre+);+/+ vs Syngap1(Cre+);+/ls	p=0.261
Syngap1(Cre-);+/+ vs Syngap1(Cre+);+/+	p=0.036
Syngap1(Cre-);+/ls vs Syngap1(Cre+);+/ls	p=0.2.642E-4
