# Supplementary material for: Re-expression of SynGAP protein in adulthood improves translatable measures of brain function and behavior
Source: eLife. 2019 Apr 26;8:e46752. doi: 10.7554/eLife.46752 (PMC6504227; doi:10.7554/eLife.46752)
Supplement: Supplementary file 3. — Subset of entries from the SYNGAP1 patient registry noting EEG abnormalities. [file elife-46752-supp3.xlsx]

## Sheet: Table S3
Supplemental File 3. Summary of EEG data from MRD5 patients in the SYNGAP1 Registry
						EEG Results						Evidence of Worsening EEG during sleep
						wakefulness			sleep
Patient # (from Registry)	age (check ages)	SYNGAP1 Variant	Developmental Assessment	Epilepsy Diagnosis	Medication at Time of EEG	general impression	ictal (behavioral event with EEG evidence)	interictal spiking activity	general impression	ictal	interictal spiking activity
5716	6	93kb deletion@6P21.32; 5 genes deleted including SYNGAP1	delayed developmental milestones (DDM)	Yes; History of absence seizure' EEG indicated generalized epilepsy	Lamictal	abnormal EEG; hemispheric slowing and photoparoxsymal responses	no events	high amplitude 2-3 Hz spike wave activity	not recorded (31 minute study)	n/a	n/a
1056	5	c.3718C>T(p.R120X); nonsense	DDM; expressive language disorder; ADHD; OCD	Yes; evidence of frequent absence Seizures	zonisamide; Zoloft; Vayarin	Abnormal background activity consistent with epilepsy diagnosis; brief runs of rhythmic 3-4Hz synchronous activity in parietal occipital leads	none noted	none noted	evidence of qualitative worsening	none noted	very sharp and high amplitude bifrontal/generalizes spikes and polyspikes; spikes also observed in bilateral occipital region; Neurologist's notes allude to more events during sleep compared to wake	**
1069	9	c.3534C>A(p.Tyr1178*); nonsense	DDM	Yes	not available	abnormal background activity consistent with epilepsy diagnosis		spikes with scattering potentials	worsening activity triggered by sleep		very high amplitude spikes and spike wave complexes
1029	11	c.199delC(p.Leu67Tyr-FS*2); frameshift	unknown	yes	not available	abnormal; slow 7Hz rhythm		some discharges observed	clear reference to "bursts were activated by sleep"; Neurologist notes that wake EEG has improved since last visit but not sleep EEG	none noted	frequent spike discharges occurring during 30% of slow wave sleep	**
8888	2	c.2946T>A (p.Y982*); nonsense	unknown	suspected absence seizures; eye rolling and eyelid fluttering	not available	abnormal; 6-7Hz background; 3Hz spike wave activity	3Hz spike wave activity	none noted	sleep achieved; sleep spindles observed	none noted	none noted
5569	7	c.2177_2180del (p.Arg726Thrfs*33); InDel causing frameshift	severe developmental delay	yes	not known	abnormal background rhythm that is symmetrical	none noted	frequent burst of activity; generalized but brief high-amplitude polyspikes and slow wave complexes; during drowsiness, more frequent multifocal spikes and poly spikes observed	clear evidence of worsening of spiking events during sleep	none noted	continuous spiking during light sleep; multifocal spikes observed mainly over the left centro-parietal region	**
5895	4	c.333del (p.Lys114Serfs*20); frameshift	global encephalopathy; developmental delay; episodes of eye rolling and staring	yes	not known	frequent high amplitude discharges	none noted	occasional multifocal independent polyspikes, spike and slow wave discharges; occasional generalized irregular polyspikes	similar types of discharges though more frequent during drowsiness and sleep	none noted	yes; more frequent (relative to awake) multifocal independent polyspikes, spike and slow wave discharges; more frequent (relative to awake) generalized irregular polyspikes	**
4793	6	c.1861C>T (p.R621X); frameshift	Developmental Delay; Autism; Seizures	yes	Keppra	anterior dominant fast activity	none noted	frequent bursts of generalized spike and wave complexes	not recorded	n/a	n/a
7666	10		developmental encephalopathy; suspected seizures	yes		abnormal	none noted	numerous brief high amplitude polymorphic generalized epileptic discharges; mainly spike wave discharges	Neurologist notes that "there is a persistent and increased frequency of high-amplitude spiking events."	none noted	increased frequency of fronto-dominant high-amplitude spike and spike and wave discharges; events were sometimes isolated and sometimes rhythmic.	**
5510	3	p.R544X; Exon 10; nonsense	Developmental Delay; Eye fluttering; severe language delay	undetermined	none at time of EEG	abnormal; 5Hz posterior dominant rhythm; some discharges	none observed	small spike wave discharges	similar events as seen during wakefulness	,-	,-
5910	3	c.1463delC (p.T488fs); frameshift	Autism	yes; intractable absence seizures	Keppra	abnormal consistent with generalized epilepsy; 5 Hz posterior dominant rhythm	several events; corresponded with increased delta	none noted	spike and wave events emerge during sleep; observed over 10% of sleep	none noted	spike and wave events	**
