# Supplementary material for: Re-expression of SynGAP protein in adulthood improves translatable measures of brain function and behavior
Source: eLife. 2019 Apr 26;8:e46752. doi: 10.7554/eLife.46752 (PMC6504227; doi:10.7554/eLife.46752)
Supplement: Supplementary file 4. — Pairwise comparisons for each of the four groups in data presented in Figure 4E–F. [file elife-46752-supp4.xlsx]

## Sheet: Table S4
Supplemental File 4. Pairwise comparison statistics used in Figure 4E-F
No Tamoxifen
Syngap1(Cre-);+/+ vs Syngap1(Cre-);+/ls	p=1.58E-9
Syngap1(Cre+);+/+ vs Syngap1(Cre+);+/ls	p=0.004
Syngap1(Cre-);+/+ vs Syngap1(Cre+);+/+	p=0.059
Syngap1(Cre-);+/ls vs Syngap1(Cre+);+/ls	p=0.074
Tamoxifen-treated
Syngap1(Cre-);+/+ vs Syngap1(Cre-);+/ls	p=2.98E-8
Syngap1(Cre+);+/+ vs Syngap1(Cre+);+/ls	p=0.307
Syngap1(Cre-);+/+ vs Syngap1(Cre+);+/+	p=0.017
Syngap1(Cre-);+/ls vs Syngap1(Cre+);+/ls	p=0.003
